# Supplementary material
Source: PubMed Central journal article supplement (PMC6644398)
Supplement: ao8b01425_si_001.pdf [file ao8b01425_si_001.pdf]

## SUPPORTING INFORMATION

### Electrochemical Detection of pH-Responsive Grafted Catechol and Immobilized Cytochrome *c* Onto Lipid Deposit-Modified Glassy Carbon Surface

Estelle Lebègue<sup>†,\*</sup>, Ricardo O. Louro<sup>‡</sup> and Frédéric Barrière<sup>†,\*</sup>

<sup>†</sup> Univ Rennes, CNRS, Institut des Sciences Chimiques de Rennes - UMR 6226, F-35000 Rennes, France.

<sup>‡</sup> Instituto de Tecnologia Química e Biológica, António Xavier, Universidade NOVA de Lisboa, 2780-157 Oeiras, Portugal.

#### Content:

**Page S2.** Figure S1.

Cyclic voltammograms of bare glassy carbon electrode with 4-nitrocatechol in solution.

**Page S3.** Figure S2.

Cyclic voltammograms of unmodified and catechol-modified glassy carbon electrode.

**Page S4.** Figure S3 and Table S1.

Cyclic voltammograms of catechol-modified electrode at different scan rates and the anodic peak current *vs.* scan rate plot (Figure S3) and apparent normal potential of cytochrome *c* recorded at lipid deposit-modified glassy carbon electrodes (Table S1).

**Page S5.** Figure S4.

The anodic peak current *vs.* the number of cycles plot at a lipid deposit-modified glassy carbon electrode in a cytochrome *c* solution.

**Page S6.** Figure S5.

Cyclic voltammograms of cytochrome *c*-modified glassy carbon electrode in phosphate buffer solution at different pH.

**Page S7.** Figure S6.

Cyclic voltammograms of catechol- and lipid deposit-modified glassy carbon electrode in cytochrome *c* solution.

**Page S8.** Figure S7.

Apparent normal potential of grafted catechol *vs.* pH plot of catechol/lipid deposit/cytochrome *c*-modified glassy carbon electrode.

**Page S9.** Figure S8.

UV-visible absorption spectra of cytochrome *c* in a methanol/ethanol/water washing solution.

**Page S10.** Figure S9.

Electrochemical impedance spectroscopy measurements recorded at a modified glassy carbon electrode in phosphate buffer electrolyte.

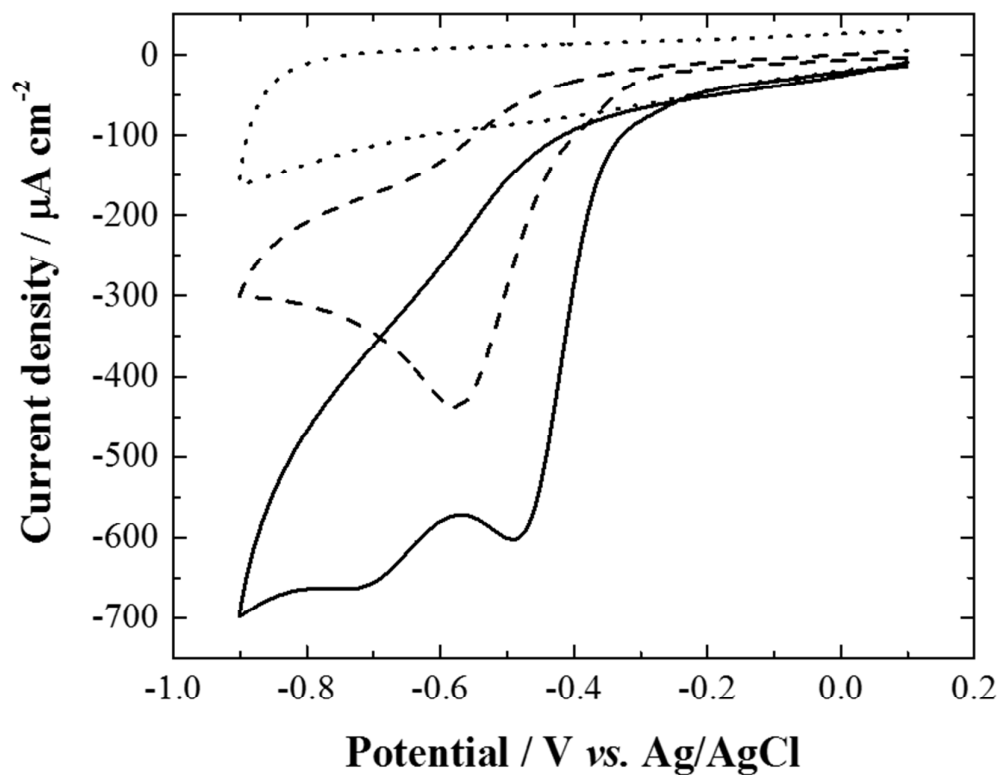

**Figure S1.** Cyclic voltammograms (1<sup>st</sup> cycle shown) recorded at  $50 \text{ mV s}^{-1}$  on bare glassy carbon electrode in  $0.1 \text{ M HCl}$  as aqueous electrolyte under inert atmosphere (Ar) in the absence (dotted line) and in the presence of  $1 \text{ mM}$  4-nitrocatechol (dashed line) and  $1 \text{ mM}$  4-nitrocatechol +  $3 \text{ mM NaNO}_2$  (solid line).

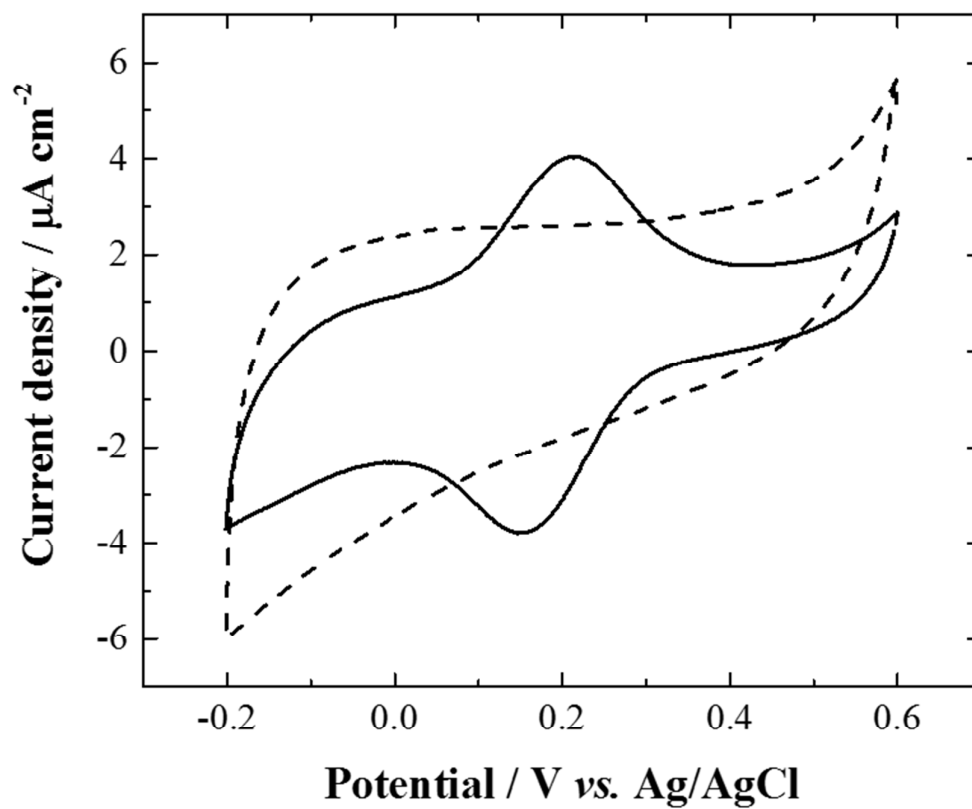

**Figure S2.** Cyclic voltammograms (3<sup>rd</sup> cycle shown) recorded at  $20 \text{ mV s}^{-1}$  on unmodified (dashed line) and catechol-modified (solid line) glassy carbon electrode in 10 mM phosphate buffer aqueous electrolyte at pH 7.2 under inert atmosphere (Ar).

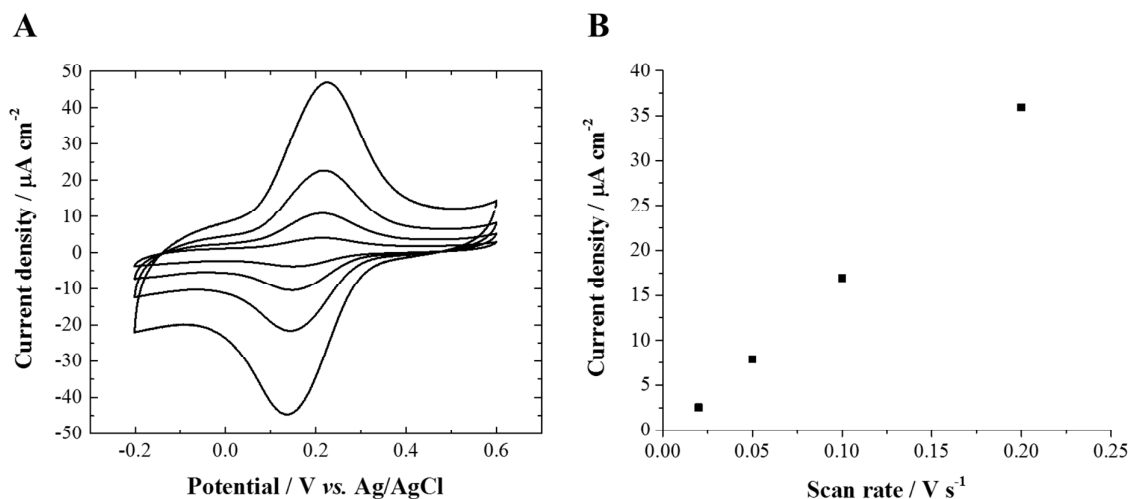

**Figure S3.** **A.** Cyclic voltammograms recorded at different scan rates (20, 50, 100 and 200  $\text{mV s}^{-1}$ ) in 10 mM phosphate buffer aqueous electrolyte at pH 7.2 under Ar on catechol-modified glassy carbon electrode. **B.** The corresponding variation of the anodic peak current ( $i_{pa}$ ) as a function of the scan rate.

**Table S1.** Apparent normal potential of cytochrome *c* detected by cyclic voltammetry (data from Figure 4 in the manuscript) at glassy carbon electrodes modified with lipid deposits of different DOPC/CL ratio, in a 0.05 mM cytochrome *c* solution in 10 mM phosphate buffer aqueous electrolyte at pH 7.2 under inert atmosphere (Ar).

| Lipid deposit composition | Apparent normal potential of cytochrome <i>c</i> (V vs. Ag/AgCl) |
|---------------------------|------------------------------------------------------------------|
| 100% CL                   | -0.002 V                                                         |
| 25% DOPC/75% CL           | +0.004 V                                                         |
| 50% DOPC/50% CL           | +0.008 V                                                         |
| 75% DOPC/25% CL           | +0.013 V                                                         |

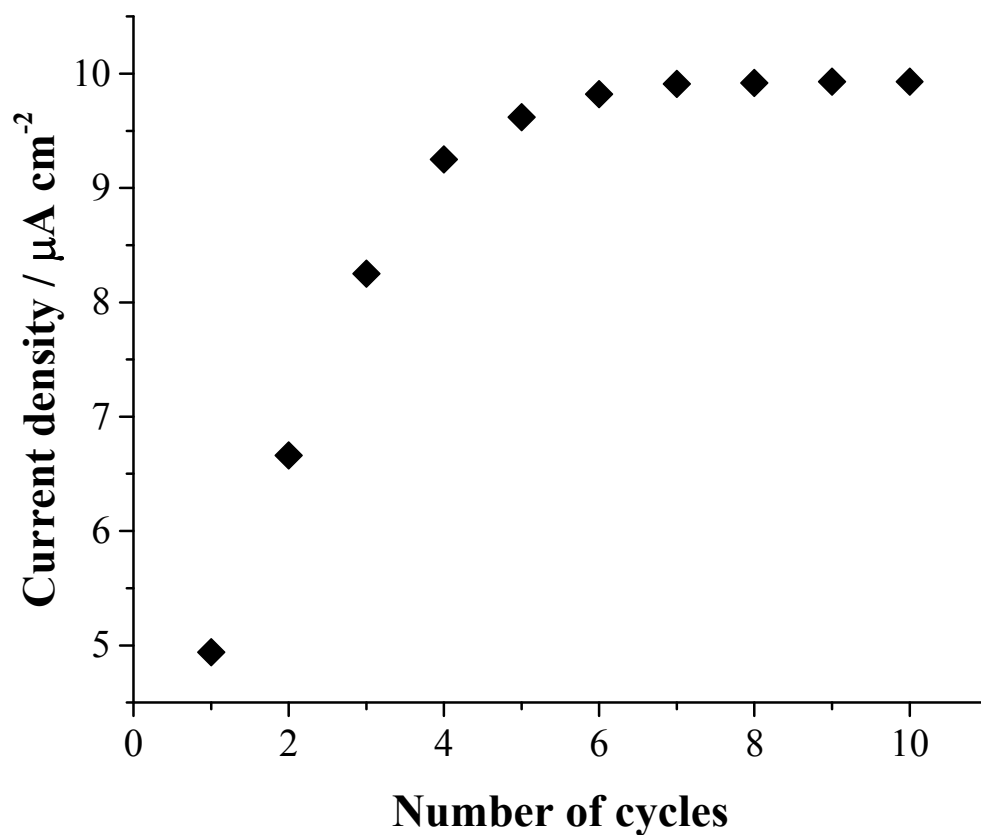

**Figure S4.** Anodic peak current density as a function of the number of cycles recorded by cyclic voltammetry (data from Figure 5A in the manuscript) at a 75% DOPC/25% CL lipid deposit-modified glassy carbon electrode in a 0.15 mM cytochrome *c* solution in 10 mM phosphate buffer aqueous electrolyte at pH 7.2 under inert atmosphere (Ar).

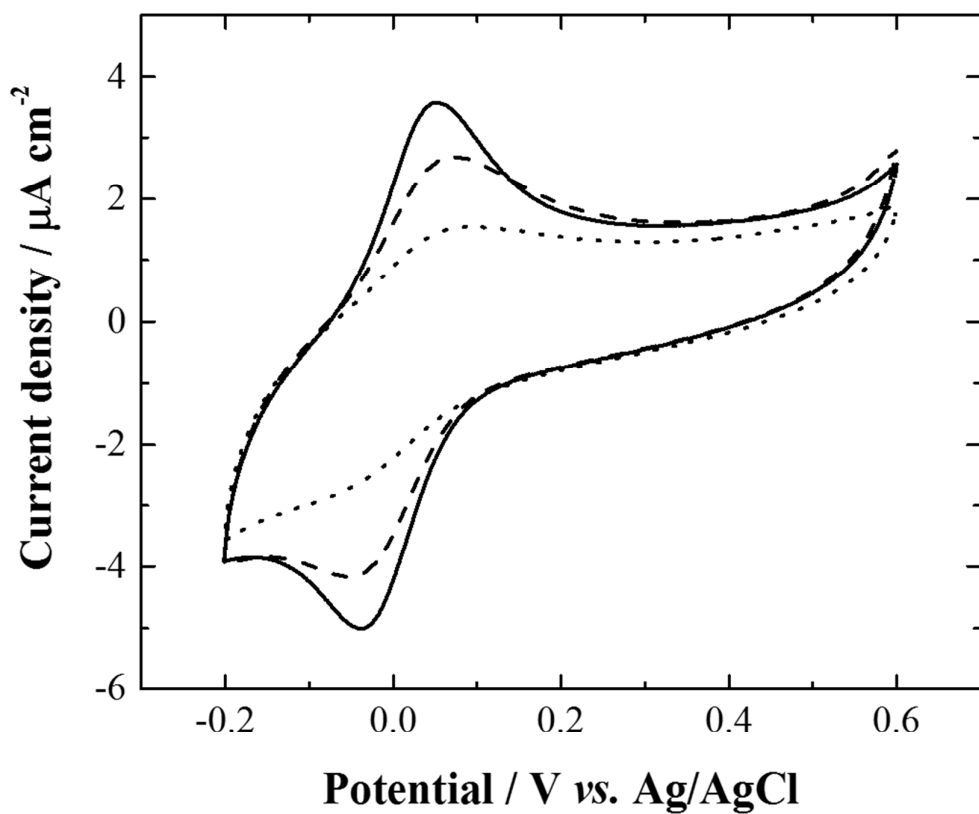

**Figure S5.** Cyclic voltammograms (3<sup>rd</sup> cycle shown) successively recorded at 20 mV s<sup>-1</sup> on cytochrome *c*-modified glassy carbon electrode in 10 mM phosphate buffer aqueous electrolyte at pH 7.2 (solid line), pH 9 (dashed line) and pH 5 (dotted line) under inert atmosphere (Ar). The peaks current decreasing from the first cyclic voltammograms (pH 7.2) to the last cyclic voltammograms (pH 5) is due to the protein desorption.

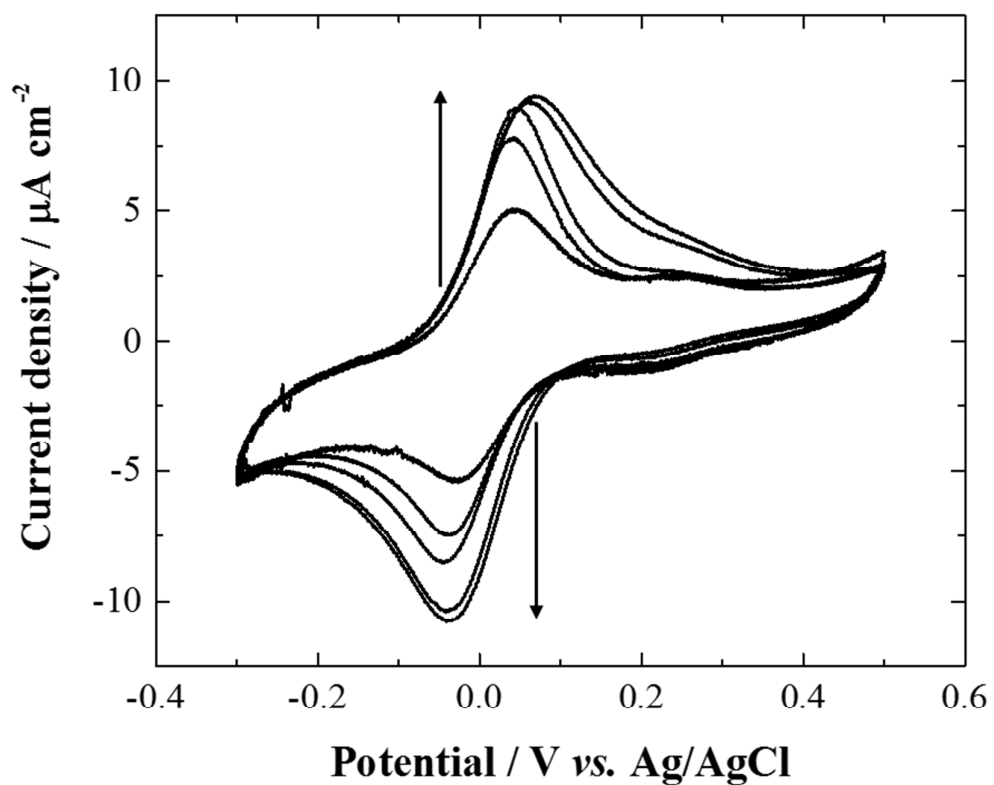

**Figure S6.** Cyclic voltammograms (1<sup>st</sup>, 2<sup>nd</sup>, 3<sup>rd</sup>, 6<sup>th</sup> and 10<sup>th</sup> cycles shown) recorded at 20 mV s<sup>-1</sup> on glassy carbon electrode modified by catechol and a 75% DOPC/25% CL lipid deposit in 0.15 mM cytochrome *c* solution 10 mM phosphate buffer aqueous electrolyte at pH 7.2 under inert atmosphere (Ar). The redox potential of the protein and of the catechol are located at ca. 0 V and +0.2 V, respectively.

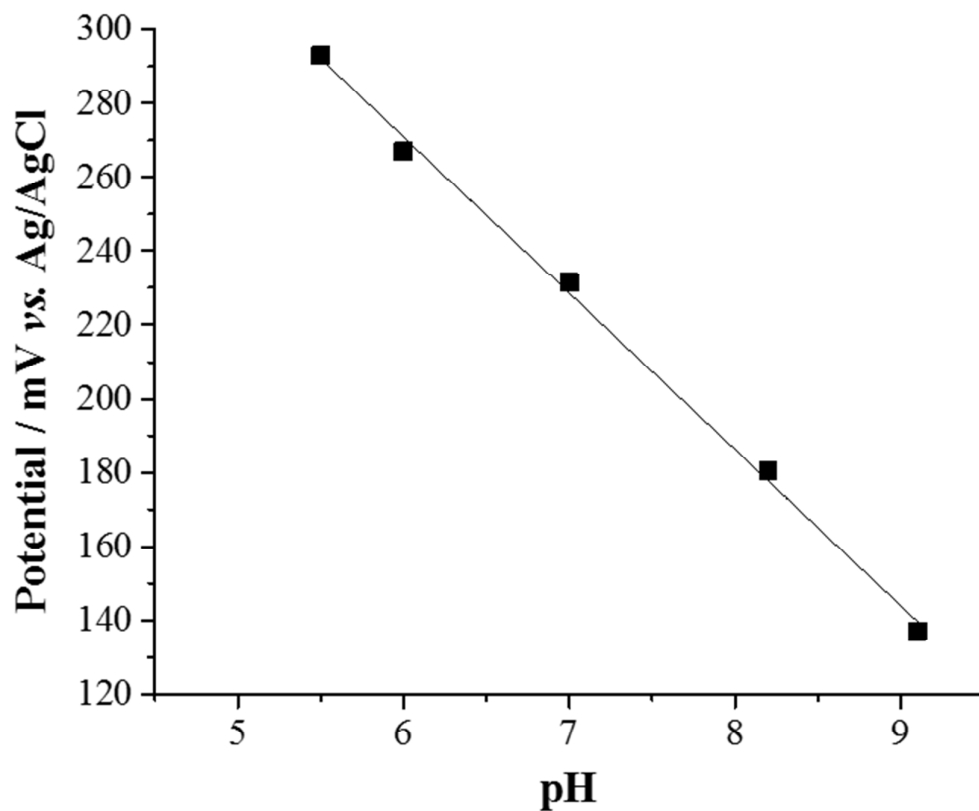

**Figure S7.** pH dependence of the apparent normal potential of the grafted catechol at the catechol/lipid deposit/cytochrome *c*-modified glassy carbon electrode (data from Figure 6 and Table 1).

Linear regression analysis:  $y = -42x + 525$ ,  $R^2 = 0.9976$ .



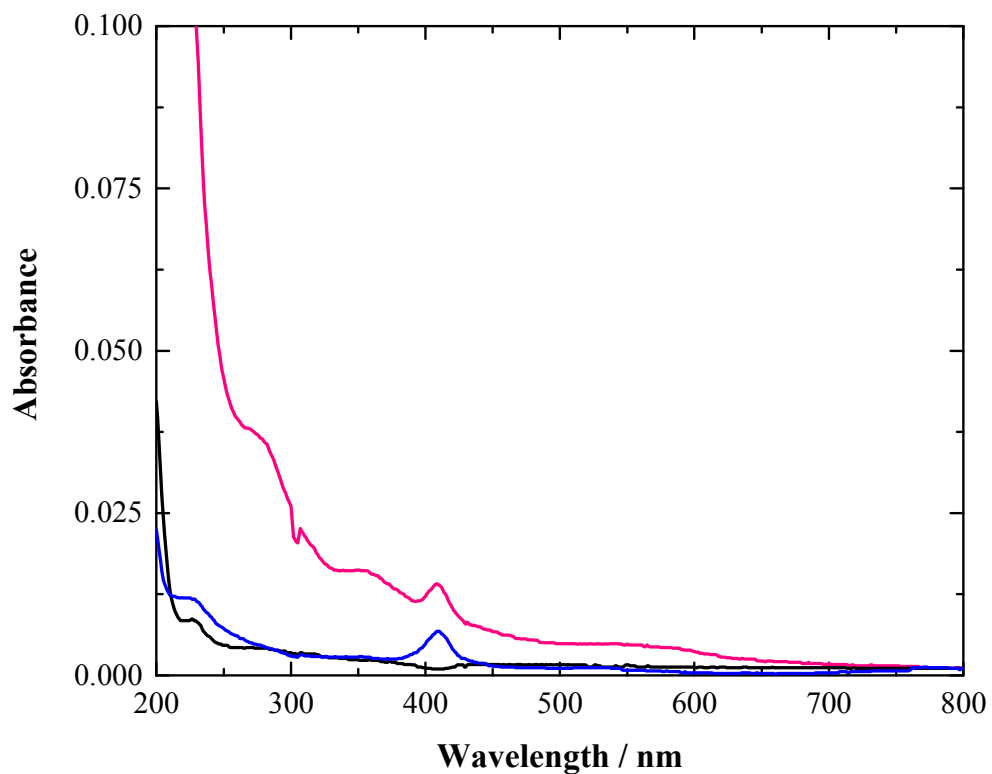

**Figure S8.** UV-visible absorption spectra of:

Blue line: a cytochrome *c* solution diluted to 25 nM.

Black line: the washing solution from glassy carbon electrodes modified by the grafted catechol and the lipid deposit of 75% DOPC/25 % CL.

Pink line: the washing solution from glassy carbon electrodes modified by grafted catechol, lipid deposit and immobilized cytochrome *c*.

The artefact located at 300 nm corresponds to the spectrophotometer lamp change.

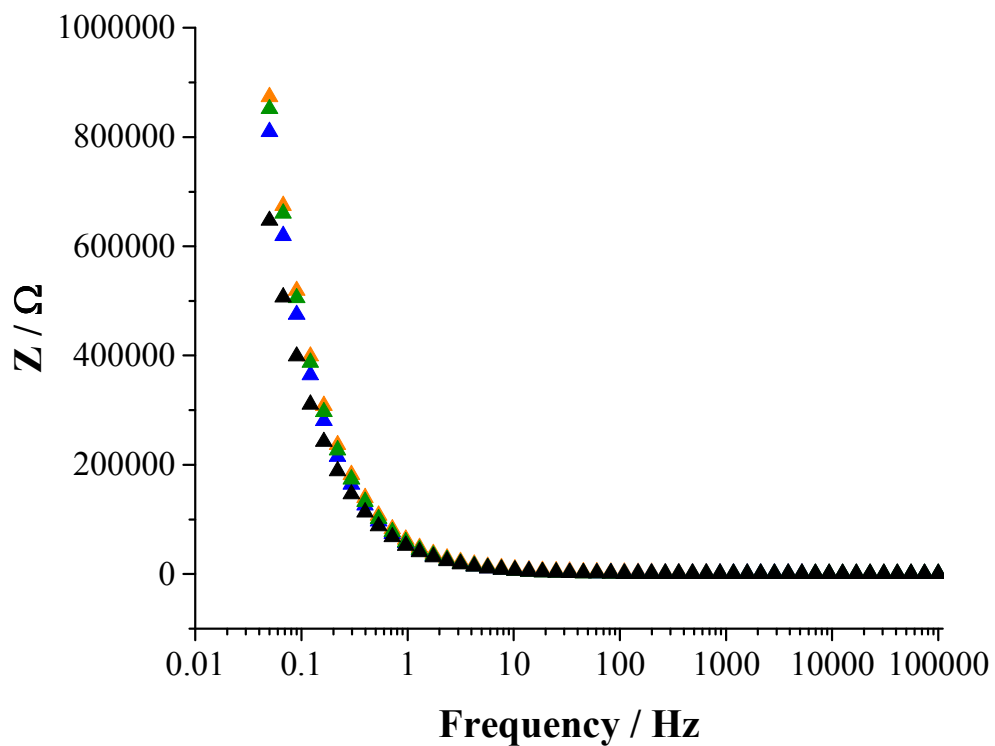

**Figure S9.** Bode plots from electrochemical impedance spectroscopy measurements successively recorded at Open Circuit Potential on glassy carbon electrodes unmodified (black) and modified by grafted catechol (green), grafted catechol and 75% DOPC/25% CL lipid deposit (blue) and catechol/lipid deposit/cytochrome *c* (orange) in 10 mM phosphate buffer aqueous electrolyte at pH 7.2 under inert atmosphere (Ar).
